# Supplementary material for: Antihypertensive Drug Use and the Risk of Ovarian Cancer Death among Finnish Ovarian Cancer Patients—A Nationwide Cohort Study
Source: MDPI journal article supplement (doi:10.3390/cancers13092087), 2021-04-26
Supplement: s1 [file s1]

## Article

# Supplementary Materials: Antihypertensive Drug Use and the Risk of Ovarian Cancer Death among Finnish Ovarian Cancer Patients—A Nationwide Cohort Study

Eerik E.E. Santala, Miia Artama, Eero Pukkala, Kala Visvanathan, Synnöve Staff, Teemu J. Murtola

**Table S1.** ATC-codes for antihypertensive drugs

| Drug                                      | ATC-Code                                                                                                                              |
|-------------------------------------------|---------------------------------------------------------------------------------------------------------------------------------------|
| Enalapril                                 | C09AA02, C09BA02, C09BB02                                                                                                             |
| Imidapril                                 | C09AA16                                                                                                                               |
| Captopril                                 | C09AA01, C09AB01                                                                                                                      |
| Cinapril                                  | C09AA06, C09BA06                                                                                                                      |
| Lisinopril                                | C09AA03, C09BA03                                                                                                                      |
| Perindopril                               | C09AA04, C09BA04, C09BB04                                                                                                             |
| Ramipril                                  | C09AA05, C09BA05, C09BB05                                                                                                             |
| Trandolapril                              | C09AA10, C09BB10                                                                                                                      |
| Other ACE-inhibitors                      | C09AA08, C09BA08, C09AA07, C09BA07, C09AA09, C09BA09, C09AA11, C09AA12, C09BA12, C09BB12, C09AA13, C09BA13, C09AA14, C09AA15, C09BA15 |
| Eprosartan                                | C09CA02, C09DA02                                                                                                                      |
| Candesartan                               | C09CA06, C09DA06                                                                                                                      |
| Losartan                                  | C09CA01, C09DA01                                                                                                                      |
| Olmesartan                                | C09CA08, C09DA08, C09DB02                                                                                                             |
| Telmisartan                               | C09CA07, C09DA07                                                                                                                      |
| Valsartan                                 | C09CA03, C09DA03, C09DB01, C09DX01                                                                                                    |
| Irbesartan                                | C09CA04, C09DA04                                                                                                                      |
| Other sartans                             | C09CA05                                                                                                                               |
| Clonidine                                 | C02AC01, C02LC01, C02LC51                                                                                                             |
| Moxonidine                                | C02AC05, C02LC05                                                                                                                      |
| Rauwolfia-alkaloids                       | C02AA01, C02AA02, C02AA03, C02AA04, C02AA05, C02AA06, C02AA07, C02AA52, C02AA53, C02AA57                                              |
| Other antagonists of imidazoline receptor | C02AC02, C02AC04, C02AC06                                                                                                             |
| Antiadrenergics                           | C02BA01, C02BB01                                                                                                                      |
| Prazosine                                 | C02CA01, C02LE01                                                                                                                      |
| Other alfa-blocking antihypertensives     | C02CA02, C02CA03, C02CA04, C02CA06                                                                                                    |
| Guanidines                                | C02CC01, C02CC02, C02CC03, C02CC04, C02CC05, C02CC06, C02CC07, C02LF01                                                                |
| Smooth muscle relaxants                   | C02DA01, C02DB01, C02DB02, C02DB03, C02DB04, C02DD01, C02DG01                                                                         |
| Other antihypertensives                   | C02KA01, C02KB01, C02KC01, C02KD01                                                                                                    |
| Acebutolol                                | C07AB04, C07BB04                                                                                                                      |
| Atenolol                                  | C07AB03, C07BB03, C07CB03, C07CB53, C07DB01, C07FB03                                                                                  |
| Betaxolol                                 | C07AB05                                                                                                                               |
| Bisoprolol                                | C07AB07, C07BB07                                                                                                                      |

|                     |                                                                                                                                                                                                                                                                                                                                                                                                                                                                  |
|---------------------|------------------------------------------------------------------------------------------------------------------------------------------------------------------------------------------------------------------------------------------------------------------------------------------------------------------------------------------------------------------------------------------------------------------------------------------------------------------|
| Carvedilol          | C07AG02                                                                                                                                                                                                                                                                                                                                                                                                                                                          |
| Labetalol           | C07AG01, C07BG01, C07CG01                                                                                                                                                                                                                                                                                                                                                                                                                                        |
| Metoprolol          | C07AB02, C07AB52, C07BB02, C07BB52, C07CB02, C07FB02                                                                                                                                                                                                                                                                                                                                                                                                             |
| Pindolol            | C07AA03, C07CA03                                                                                                                                                                                                                                                                                                                                                                                                                                                 |
| Propranolol         | C07AA05, C07BA05, C07FA05                                                                                                                                                                                                                                                                                                                                                                                                                                        |
| Seliprolol          | C07AB08                                                                                                                                                                                                                                                                                                                                                                                                                                                          |
| Timolol             | C07AA06, C07BA06, C07DA06                                                                                                                                                                                                                                                                                                                                                                                                                                        |
| Nebivolol           | C07AB12                                                                                                                                                                                                                                                                                                                                                                                                                                                          |
| Other beta-blockers | C07AA01, C07AA12, C07AA14, C07AA15, C07AA16, C07AA17, C07AA19, C07AA23, C07AA27, C07AB01, C07AB06, C07AB09, C07AB10, C07AB11, C07AB13, C07BA12, C07BA68, C07BB06, C07CA17, C07CA23                                                                                                                                                                                                                                                                               |
| Amiloride           | C03DB01, C03EA01                                                                                                                                                                                                                                                                                                                                                                                                                                                 |
| Furosemide          | C03CA01, C03CB01, C03EB01                                                                                                                                                                                                                                                                                                                                                                                                                                        |
| Hydrochlorothiazide | C03AA03, C03AB03, C03AX01, C02LB01, C02LC01, C02LC05, C02LC51, C02LE01, C07BA02, C07BA05, C07BA06, C07BA07, C07BA12, C07BA68, C07BB02, C07BB03, C07BB04, C07BB06, C07BB07, C07BB52, C07BG01, C07DA06, C07DB01, C08GA01, C09BA01, C09BA02, C09BA03, C09BA05, C09BA06, C09BA07, C09BA08, C09BA09, C09BA12, C09BA13, C09BA15, C09DA01, C09DA02, C09DA03, C09DA04, C09DA06, C09DA07, C09DA08, C03EA01                                                                |
| Indapamide          | C03BA11, C09BA04                                                                                                                                                                                                                                                                                                                                                                                                                                                 |
| Spironolactone      | C03DA01                                                                                                                                                                                                                                                                                                                                                                                                                                                          |
| Triamteren          | C03DB02, C03EA02, C03EA03, C03EA04, C03EA05, C03EA06, C03EA07, C03EA12, C03EA13, C03EA14, C03EB01, C03EB02                                                                                                                                                                                                                                                                                                                                                       |
| Trichlormethiazide  | C03AA06, C03AB06, C03EA02                                                                                                                                                                                                                                                                                                                                                                                                                                        |
| Other diuretics     | C03AA01, C03AA02, C03AA04, C03AA05, C03AA07, C03AA08, C03AA09, C03AA13, C03AB01, C03AB02, C03AB04, C03AB05, C03AB07, C03AB08, C03AH01, C03AH02, C03BA02, C03BA03, C03BA04, C03BA07, C03BA09, C03BA10, C03BA12, C03BA13, C03BA82, C03BB02, C03BB03, C03BB04, C03BB07, C03BC01, C03BD01, C03BX03, C03CA03, C03CA04, C03CC01, C03CC02, C03CD01, C03CX01, C03DA02, C03DA03, C03DA04, C03EA03, C03EA04, C03EA05, C03EA06, C03EA07, C03EA13, C03EA14, C03XA01, C03XA02 |
| Amlodipine          | C08CA01, C09DB01, C09DB02, C09DX01, C09BB04                                                                                                                                                                                                                                                                                                                                                                                                                      |
| Diltiazem           | C08DB01                                                                                                                                                                                                                                                                                                                                                                                                                                                          |
| Felodipine          | C08CA02, C09BB05, C07FB02                                                                                                                                                                                                                                                                                                                                                                                                                                        |
| Isradipine          | C08CA03                                                                                                                                                                                                                                                                                                                                                                                                                                                          |
| Lercanidipine       | C08CA13, C09BB02                                                                                                                                                                                                                                                                                                                                                                                                                                                 |
| Nifedipine          | C08CA05, C08CA55, C08GA01, C07FB03                                                                                                                                                                                                                                                                                                                                                                                                                               |
| Nilvadipine         | C08CA10                                                                                                                                                                                                                                                                                                                                                                                                                                                          |
| Nimodipine          | C08CA06                                                                                                                                                                                                                                                                                                                                                                                                                                                          |
| Nisoldipine         | C08CA07                                                                                                                                                                                                                                                                                                                                                                                                                                                          |

|                                |                                                                                                                              |
|--------------------------------|------------------------------------------------------------------------------------------------------------------------------|
| Verapamil                      | C08DA01, C08DA51, C09BB10                                                                                                    |
| Other calcium-channel blockers | C08CA04, C08CA08, C08CA09, C08CA11, C08CA12, C08CA14, C08CA15, C08CX01, C08DA02, C08EA01, C08EA02, C08EX01, C08EX02, C09BB12 |
| Aliskiren                      | C09XA02                                                                                                                      |

**Table S2.** Risk of OC death by antihypertensive drug use. A competing risk analysis.

| Drug Group               | Risk of OC Death, HR (95% CI) |
|--------------------------|-------------------------------|
| ACE inhibitors           | 0.73 (0.58–0.91)              |
| ATR-blockers             | 0.62 (0.34–1.12)              |
| Beta-blockers            | 0.86 (0.72–1.02)              |
| Calcium-channel blockers | 0.93 (0.71–1.21)              |
| Furosemide               | 1.03 (0.85–1.25)              |
| Other diuretics          | 1.03 (0.81–1.32)              |
